# Supplementary material for: Reconstructing Genomes of Carbon Monoxide Oxidisers in Volcanic Deposits Including Members of the Class Ktedonobacteria
Source: PubMed Central journal article supplement (PMC7761526; doi:10.3390/microorganisms8121880), 2020-11-27
Supplement: microorganisms-08-01880-s001.pdf [file microorganisms-08-01880-s001.pdf]

## Supplementary Information

### Reconstructing genomes of carbon monoxide oxidisers in volcanic deposits including members of the class Ktedonobacteria

Marcela Hernández <sup>1,2,6,\*</sup>, Blanca Vera-Gargallo <sup>3</sup>, Marcela Calabi-Floody <sup>4</sup>, Gary M King <sup>5</sup>, Ralf Conrad <sup>6</sup> and Christoph C. Tebbe <sup>1</sup>

<sup>1</sup> Thünen Institut für Biodiversität, Braunschweig, Germany, christoph.tebbe@thuenen.de;

<sup>2</sup> School of Environmental Sciences, Norwich Research Park, University of East Anglia, Norwich, UK, marcela.hernandez@uea.ac.uk;

<sup>3</sup> Department of Microbiology and Parasitology, Faculty of Pharmacy, University of Seville, Seville, Spain, vera@us.es;

<sup>4</sup> BIOREN-UFRO, Universidad de La Frontera, Temuco, Chile; marcela.calabi@ufrontera.cl;

<sup>5</sup> Department of Biological Sciences, Louisiana State University, Baton Rouge, LA, USA; gkingme@gmail.com;

<sup>6</sup> Max Planck Institute for Terrestrial Microbiology, Marburg, Germany, conrad@mpi-marburg.mpg.de;

\*Correspondence: marcela.hernandez@uea.ac.uk (M.H.)

#### Supplementary figure legend:

Figure S1. Relative abundance of main phyla based on classification of scaffolds >500 bp. Other phyla include members of Planctomycetes, Gemmatimonadetes, Cyanobacteria, Firmicutes, Armatimonadetes and Patescibacteria.

#### Supplementary table legends:

Table S1. List of strains used for the tree construction.

Table S2. Summary table of other complete cellular functions in the MAGs isolates from sites 1640, 1751 and 1957 retrieved from KEGG analysis. Reference genomes for Ktedonobacteria: DSM45816T [1], DSM44963<sup>T</sup> [2] and NBRC 113551<sup>T</sup> [3], (K: KEGG orthology; M: KEGG Mode). Asterisks indicate the MAGs isolated from the class Ktedonobacteria.

Table S3. Summary of the metagenome-assembled genomes (MAGs) isolated in the present study. Average amino-acid identity (AAI) was calculated by comparing the MAGs with their closest reference genomes identified based on the RAST results. The RefSeq accession number of the reference genomes are provided in parenthesis.

Table S4. Summary of enzymatic functions for CO-, H<sub>2</sub>-, and formate-oxidation in the Ktedonobacteria reference genomes. Carbon monoxide oxidation: K03518 carbon monoxide dehydrogenase small subunit coxS, K03519 carbon monoxide dehydrogenase medium subunit coxM, K03520 carbon monoxide dehydrogenase large subunit coxL. Formate oxidation: K00122 formate dehydrogenase, K00123 formate dehydrogenase major subunit. Hydrogen oxidation: H<sub>2</sub> dehydrogenase: K00436: NAD-reducing hydrogenase large subunit.

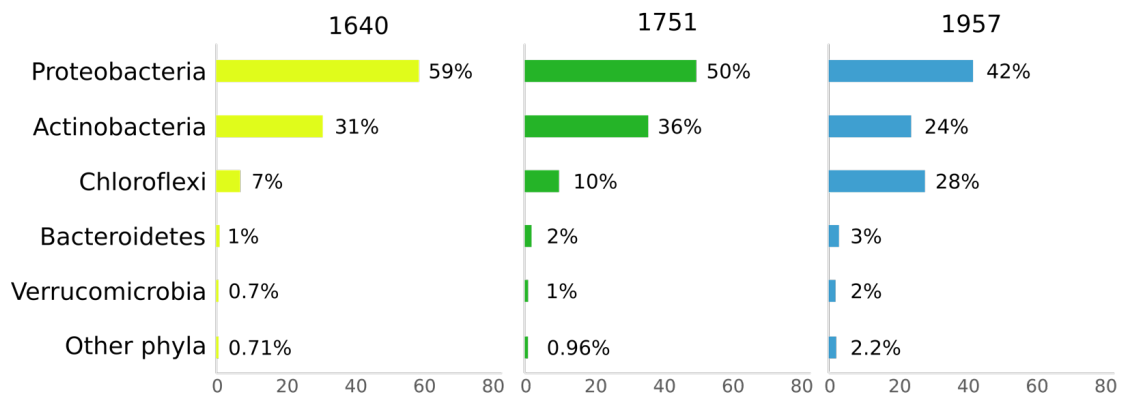

Figure S1. Relative abundance of main phyla based on classification of scaffolds >500 bp. Other phyla include members of Planctomycetes, Gemmatimonadetes, Cyanobacteria, Firmicutes, Armatimonadetes and Patescibacteria.

Table S1. List of strains used for the tree construction.

| Strain name                                           | Type strain        | NCBI Accession number |
|-------------------------------------------------------|--------------------|-----------------------|
| <i>Acetobacter acetii</i> TMW2.1153                   | NZ_CP014692.1      |                       |
| <i>Acetobacter orleanensis</i> JCM 7639               | NZ_BAMY01000269.1  |                       |
| <i>Acetobacter pasteurianus</i> IFO 3283-01           | NC_013209.1        |                       |
| <i>Acetobacter syzygii</i> 9H-2                       | NZ_BAMZ01000094.1  |                       |
| <i>Acidipila dinghuensis</i> DHOF10                   | NZ_SDMK01000001.1  |                       |
| <i>Acidipila rosea</i> DSM 103428                     | NZ_SMGK01000001.1  |                       |
| <i>Acidiphtheria rubrifaciens</i> HS-AP3              | NZ_BANB01001239.1  |                       |
| <i>Acidobacterium capsulatum</i> ATCC51196            | NC_012483.1        |                       |
| <i>Acidocella aminolytica</i> 101                     | NZ_FQVJ01001009.1  |                       |
| <i>Actinosynnema mirum</i> DSM 43827                  | NC_013093.1        |                       |
| <i>Ammonifex degensii</i> KC4                         | NC_013385.1        |                       |
| <i>Asaia bogorensis</i> NBRC 16594                    | NZ_AP014690.1      |                       |
| <i>Bacteroides fragilis</i> YCH46                     | NC_006347.1        |                       |
| <i>Bacteroides ovatus</i> ATCC 8483                   | NZ_CP012938.1      |                       |
| <i>Bacteroides uniformis</i> ATCC 8492                | NZ_DS362249.1      |                       |
| <i>Bacteroides vulgatus</i> ATCC 8482                 | NC_009614.1        |                       |
| <i>Bacteroides dorei</i> CLO3T12C01                   | NZ_CP011531.1      |                       |
| <i>Beutenbergia covernae</i> DSM 12333                | NC_012669.1        |                       |
| <i>Bryobacter aggregatus</i> MPL3                     | NZ_JNIF010000001.1 |                       |
| <i>Candidatus</i> Koribacter versatilis Ellin345      | NC_008009.1        |                       |
| <i>Candidatus</i> Solibacter usitatus Ellin6076       | NC_008536.1        |                       |
| <i>Chloroflexus aurantiacus</i> J-10-fI               | NC_010175.1        |                       |
| <i>Dictyobacter aurantiacus</i> S-27                  | NZ_BIFQ01000001.1  |                       |
| <i>Dictyobacter alpinus</i> Uno16                     | NZ_BIF01000001.1   |                       |
| <i>Dictyobacter kobayashii</i> Uno11                  | NZ_BKZW01000001.1  |                       |
| <i>Dictyobacter vulcani</i> W12                       | NZ_JQK01000001.1   |                       |
| <i>Edaphobacter aggregans</i> DSM 19364               | NZ_SHKW01000001.1  |                       |
| <i>Edaphobacter modestus</i> DSM 18101                | NGF010000005.1     |                       |
| <i>Gemmatimonadetes</i> bacterium 2013_60CM_65_52     | NC_012489.1        |                       |
| <i>Gemmatimonas aurantiaca</i> T-27                   | NZ_CP011454.1      |                       |
| <i>Gemmatimonas phototrophica</i> AP64                | NZ_CP007128.1      |                       |
| <i>Gemmatirosa kalamazoonesis</i> KBS708              | NC_011365.1        |                       |
| <i>Glucanacetobacter diazotrophicus</i> PAI 5         | NZ_NKUF01000001.1  |                       |
| <i>Glucanacetobacter entanii</i> LTH 4560             | NZ_BJVA01000001.1  |                       |
| <i>Glucanobacter kanchanaburiensis</i> NBRC 103587    | NC_019396.1        |                       |
| <i>Glucanobacter oxydans</i> H24                      | NZ_LHZP010000023.1 |                       |
| <i>Glucanobacter roseus</i> LMG 1418                  | NZ_BJMK01000001.1  |                       |
| <i>Glucanobacter sphaericus</i> NBRC 12467            | NZ_BANH01000191.1  |                       |
| <i>Glucanobacter thailandicus</i> F149-1              | NZ_BJUZ01000001.1  |                       |
| <i>Glucanobacter wancherniae</i> NBRC 103581          | NC_016631.1        |                       |
| <i>Granulicella mallensis</i> MP5ACTX8                | NC_015064.1        |                       |
| <i>Granulicella tundralica</i> MP5ACTX9               | CP000875.1         |                       |
| <i>Herpetosiphon aurantiacus</i> DSM 785              |                    |                       |
| continuation...                                       |                    |                       |
| <i>Komagataeibacter europaeus</i> SRCM101446          | NZ_CP021467.1      |                       |
| <i>Komagataeibacter hansenii</i> ATCC 23769           | NZ_CV000920.1      |                       |
| <i>Komagataeibacter oboediensis</i> 174Bp2            | NZ_CADT01000200.1  |                       |
| <i>Komagataeibacter xylini</i> E25                    | NZ_CP004360.1      |                       |
| <i>Ktedonobacter racemifer</i> DSM 44963              | NZ_ADVG01000010.1  |                       |
| <i>Ktedonosporobacter rubrifoli</i> SCAM5-G2          | NZ_CP035758.1      |                       |
| <i>Mycobacterium tuberculosis</i> H37Rv               | NC_00962.3         |                       |
| <i>Mycobacterium vanbaalenii</i> PVY-1                | NC_008726.1        |                       |
| <i>Nocardia farcinica</i> NCTC11134                   | NZ_LN868938.1      |                       |
| <i>Nocardioopsis dassonvillei</i> DSM 43111           | NC_014210.1        |                       |
| <i>Prostheco bacter fusiformis</i> ATCC 25309         | NZ_SOCA01000001.1  |                       |
| <i>Prostheco bacter debontii</i> ATCC 700200          | NZ_FUYE01000055.1  |                       |
| <i>Rhodococcus jostii</i> RHA1                        | NC_008268.1        |                       |
| <i>Roseiflexus castenholzii</i> DSM 13941             | NC_009767.1        |                       |
| <i>Roseimicrobium gellanilyticum</i> DSM 25532        | NZ_QNRR01000001.1  |                       |
| <i>Roseomonas gilardii</i> U14-5                      | NZ_CP015583.1      |                       |
| <i>Saccharomonospora viridis</i> DSM 43017            | NC_013159.1        |                       |
| <i>Saccharopolyspora erythraea</i> NRRL2338           | NC_009142.1        |                       |
| <i>Salinispora arenicola</i> CNS-205                  | NC_009953.1        |                       |
| <i>Salinispora tropica</i> CNB-440                    | NC_009380.1        |                       |
| <i>Sphaerobacter thermophilus</i> DSM 20745           | NC_013523.1        |                       |
| <i>Streptomyces avermitilis</i> MA-4680               | NC_003155.5        |                       |
| <i>Streptomyces coelicolor</i> A3(2)                  | NC_003888.3        |                       |
| <i>Streptomyces griseus</i> subsp. griseus NBRC 13350 | NC_010572.1        |                       |
| <i>Streptomyces scabiei</i> 87.22                     | NC_013929.1        |                       |
| <i>Streptosporangium roseum</i> DSM 43021             | NC_013595.1        |                       |
| <i>Tengyonobacter tsumagaensis</i> Uno3               | NZ_BIFR01000001.1  |                       |
| <i>Terriglobus albidus</i> ORNL                       | NZ_CP042806.1      |                       |
| <i>Terriglobus roseus</i> DSM 18391                   | NC_018014.1        |                       |
| <i>Terriglobus saanensis</i> SP1PR4                   | NC_014963.1        |                       |
| <i>Terriglobus</i> sp. TAA 43                         | NZ_JUGR01000001.1  |                       |
| <i>Thermobifida fusca</i> YX                          | NC_007333.1        |                       |
| <i>Thermogemmatimonas carboxidivorans</i> PM5         | NZ_JNIM01000001.1  |                       |
| <i>Thermogemmatimonas tikiterensis</i> T81            | NZ_MCF01000002.1   |                       |
| <i>Thermogemmatimonas onikobensis</i> NBRC 111776     | NZ_BKZV01000001.1  |                       |
| <i>Thermomicrobium aurantia</i> A1-2                  | NC_011959.1        |                       |
| <i>Thermomicrobium roseum</i> DSM 5159                | NC_013510.1        |                       |
| <i>Thermomonospora curvata</i> DSM 43183              | NZ_BIFX01000001.1  |                       |
| <i>Thermosporothrix hazakensis</i> SK20-1             | NZ_BIFX01000001.1  |                       |
| <i>Verrucocomicrobium spinosum</i> DSM 4136           | NZ_ABIZ01000001.1  |                       |
| <i>Verrucocomicrobium</i> sp. GAS474                  | LT629781           |                       |



Table S3. Summary of the metagenome-assembled genomes (MAGs) isolated in the present study. Average amino-acid identity (AAI) was calculated by comparing the MAGs with their closest reference genomes identified based on the RAST results. The RefSeq accession number of the reference genomes are provided in parenthesis.

| MAG           | Completeness (%) | Contamination (%) | GC (%) | N50    | Size (bp) | Phyla            | Class/Order             | Reference genome                                                              | AAI (%) |
|---------------|------------------|-------------------|--------|--------|-----------|------------------|-------------------------|-------------------------------------------------------------------------------|---------|
| MAG-1640-1.1  | 80.57            | 1.536             | 69.1   | 8867   | 5073303   | Actinobacteria   | Actinomycetales         | <i>Actinosynnema mirum</i> DSM 43827 <sup>T</sup> (NC_013093.1)               | 58.65   |
| MAG-1640-2.1  | 85.36            | 3.738             | 66.8   | 11294  | 5751495   | Proteobacteria   | Rhodospirillales        | <i>Roseomonas gilardii</i> U14-5 (NZ_CP015583.1)                              | 49.1    |
| MAG-1751-1.1  | 70.3             | 3.1               | 70.8   | 7414   | 4752807   | Acidobacteria    | Bryobacteriales         | <i>Candidatus</i> Koribacter versatilis Ellin345 (NC_008009.1)                | 40.96   |
| MAG-1957-1.1  | 85.8             | 3.48              | 58.3   | 67512  | 4938955   | Acidobacteria    | Bryobacteriales         | <i>Bryobacter aggregatus</i> MPL3 <sup>T</sup> (NZ_JNIF01000001.1)            | 49.77   |
| MAG-1957-2.1  | 96.2             | 3.96              | 53.4   | 119701 | 6327585   | Chloroflexi      | Ktedonobacteria         | <i>Ktedonosporobacter rubrisol</i> SCAWS-G2 <sup>T</sup> (NZ_CP035758.1)      | 59.01   |
| MAG-1957-3.1  | 72.22            | 3.47              | 51.7   | 13375  | 6142618   | Chloroflexi      | Ktedonobacteria         | <i>Dictyobacter vulcani</i> W12 <sup>T</sup> (NZ_BKZW01000001.1)              | 63.43   |
| MAG-1957-4.1  | 72.64            | 0.1               | 67.2   | 5165   | 3007516   | Firmicutes       | Thermoanaerobacteriales | <i>Ammonifex degensii</i> KC4 <sup>T</sup> (NC_013385.1)                      | 41.36   |
| MAG-1957-5.1  | 98.05            | 0.9               | 71.4   | 79391  | 5837494   | Actinobacteria   | Actinomycetales         | <i>Actinosynnema mirum</i> DSM 43827 <sup>T</sup> (NC_013093.1)               | 55.92   |
| MAG-1957-6.1  | 80.36            | 1.98              | 54.8   | 22264  | 5685492   | Chloroflexi      | Ktedonobacteria         | <i>Ktedonosporobacter rubrisol</i> SCAWS-G2 <sup>T</sup> (NZ_CP035758.1)      | 58.66   |
| MAG-1957-7.1  | 94.02            | 1.71              | 58.9   | 137749 | 4659534   | Acidobacteria    | Bryobacteriales         | <i>Candidatus</i> Koribacter versatilis Ellin345 (NC_008009.1)                | 47.98   |
| MAG-1957-8.1  | 70.49            | 3.3               | 72.5   | 10863  | 4227183   | Gemmatimonadetes | Gemmatimonadales        | <i>Gemmatirosa kalamazoonesis</i> KBS708 <sup>T</sup> (NZ_CP007128.1)         | 60.46   |
| MAG-1957-9.1  | 90.97            | 4.94              | 71.3   | 26163  | 6509599   | Actinobacteria   | Actinomycetales         | <i>Streptosporangium roseum</i> DSM 43021 <sup>T</sup> (NC_013595.1)          | 52.26   |
| MAG-1957-10.1 | 72.61            | 1.07              | 71.4   | 17599  | 4220629   | Actinobacteria   | Actinomycetales         | <i>Streptosporangium roseum</i> DSM 43021 <sup>T</sup> (NC_013595.1)          | 52.93   |
| MAG-1957-11.1 | 89.03            | 1.72              | 60.9   | 88061  | 3399414   | Acidobacteria    | Acidobacteriales        | <i>Acidipila rosea</i> DSM 103428 (NZ_SMGK01000001.1)                         | 54.36   |
| MAG-1957-12.1 | 73.41            | 1.72              | 58.9   | 22191  | 4793286   | Acidobacteria    | Acidobacteriales        | <i>Acidobacterium capsulatum</i> ATCC 51196 <sup>T</sup> (NC_012483.1)        | 57.18   |
| MAG-1957-13.1 | 95.6             | 4.09              | 60.5   | 13562  | 5255071   | Verrucomicrobia  | Verrucomicrobiales      | <i>Prostheco bacter debontii</i> ATCC 700200 <sup>T</sup> (NZ_FUYE01000055.1) | 44.57   |
| MAG-1957-14.1 | 96.79            | 3.19              | 61.9   | 29422  | 6536060   | Proteobacteria   | Rhodospirillales        | <i>Acidisphaera rubrifaciens</i> HS-AP3 <sup>T</sup> (NZ_BANB01001239.1)      | 61.34   |
| MAG-1957-15.1 | 94.61            | 3.54              | 61.5   | 71986  | 3914044   | Acidobacteria    | Acidobacteriales        | <i>Acidipila rosea</i> DSM 103428 (NZ_SMGK01000001.1)                         | 57.33   |
| MAG-1957-16.1 | 99.14            | 0.86              | 65.4   | 109666 | 3669710   | Acidobacteria    | Acidobacteriales        | <i>Acidipila rosea</i> DSM 103428 (NZ_SMGK01000001.1)                         | 57.44   |

Table S4. Summary of enzymatic functions for CO<sub>2</sub>-, H<sub>2</sub>-, and formate-oxidation in the Ktedonobacteria reference genomes. Carbon monoxide oxidation: K03518 carbon monoxide dehydrogenase small subunit coxS, K03519 carbon monoxide dehydrogenase medium subunit coxM, K03520 carbon monoxide dehydrogenase large subunit coxL. Formate oxidation: K00122 formate dehydrogenase, K00123 formate dehydrogenase major subunit. Hydrogen oxidation: H<sub>2</sub> dehydrogenase: K00436: NAD-reducing hydrogenase large subunit.

| Species                                   | Strain                | Isolation source        | RefSeq             | Collection    | Reference   | K03518 | K03519 | K03520 | K00122 | K00123 | K00436 |
|-------------------------------------------|-----------------------|-------------------------|--------------------|---------------|-------------|--------|--------|--------|--------|--------|--------|
| <i>Ktedonobacter racemifer</i>            | SOSP1-21 <sup>T</sup> | European soils          | NZ_ADVG00000000.1  | DSM 44963     | [2]         | x      | x      | x      | x      | x      | x      |
| <i>Dicytobacter aurantiacus</i>           | S-27 <sup>T</sup>     | paddy soils             | NZ_BIFQ00000000.1  | ASM396751v1   | [4]         | x      | x      | x      | x      | x      | x      |
| <i>Dicytobacter vulcani</i>               | W12 <sup>T</sup>      | volcanic soils          | NZ_BKZW00000000.1  | NBRC113551T   | [3]         | x      | x      | x      | x      | x      | x      |
| <i>Thermosporothrix hazakensis</i>        | SK20-1 <sup>T</sup>   | ripe compost            | NZ_BIFX00000000.1  | ATCC BAA-1881 | [5]         | x      | x      | x      | x      | x      | x      |
| <i>Ktedonosporobacter rubrisoli</i>       | SCAWS-G2 <sup>T</sup> | red soils               | GCF_004208415.1    | DSM:105258    | [6]         | x      | x      | x      | x      | x      | x      |
| <i>Tenguaobacter tsumagoiensis</i>        | Uno3 <sup>T</sup>     | soil-like granular mass | NZ_BIFR00000000.1  | ASM396753v1   | [7]         | x      | x      | x      | x      | x      | x      |
| <i>Dicytobacter kobayashii</i>            | Uno11 <sup>T</sup>    | soil-like granular mass | NZ_BIFS00000000.1; | ASM396755v1   | [7]         | x      | x      | x      | x      | x      | x      |
| <i>Dicytobacter alpinus</i>               | Uno16 <sup>T</sup>    | soil-like granular mass | NZ_BIFT00000000.1  | ASM396757v1   | [7]         | x      | x      | x      | x      | x      | x      |
| <i>Thermogemmatispora aurantia</i>        | A1-2 <sup>T</sup>     | geothermal soil         | NZ_BKZV00000000.1  | ASM897428v1   | [8]         | x      | x      | x      | x      | x      | x      |
| <i>Thermogemmatispora onikobensis</i>     | NBRC 111776           | geothermal soil         | NZ_BDGT00000000.1  | ASM174828v1   | unpublished | x      | x      | x      | x      | x      | x      |
| <i>Thermogemmatispora carboxidivorans</i> | PM5 <sup>T</sup>      | biofilm                 | NZ_JNIM00000000.1; | DSM45816T     | [1]         | x      | x      | x      | x      | x      | x      |

## Supplementary references

1. King, C.E.; King, G.M. Description of *Thermogemmatispora carboxidivorans* sp. Nov., a carbon-monoxide-oxidizing member of the class Ktedonobacteria isolated from a geothermally heated biofilm, and analysis of carbon monoxide oxidation by members of the class Ktedonobacteria. *Int. J. Syst. Evol. Microbiol.* **2014**, *64*, 1244-1251.
2. Chang, Y.J.; Land, M.; Hauser, L.; Chertkov, O.; Del Rio T.G.; Nolan, M.; et al. Non-contiguous finished genome sequence and contextual data of the filamentous soil bacterium *Ktedonobacter racemifer* type strain (SOSP1-21). *Stand. Genomic. Sci.* **2011**, *5*, 97-111.
3. Zheng, Y.; Wang, C.M.; Sakai, Y.; Abe, K.; Yokota, A.; Yabe, S. *Dictyobacter vulcani* sp. nov., belonging to the class Ktedonobacteria, isolated from soil of the Mt Zao volcano. *Int. J. Syst. Evol. Microbiol.* **2020**, *70*, 1805-1813.
4. Yabe, S.; Sakai, Y.; Abe, K.; Yokota, A.; Také, A.; Matsumoto, A.; et al. *Dictyobacter aurantiacus* gen. nov., sp. nov., a member of the family Ktedonobacteraceae, isolated from soil, and emended description of the genus *Thermosporothrix*. *Int. J. Syst. Evol. Microbiol.* **2017**, *67*, 2615-2621.
5. Yabe, S.; Aiba, Y.; Sakai, Y.; Hazaka, M.; Yokota, A. *Thermosporothrix hazakensis* gen. nov., sp. nov., isolated from compost and description of Thermosporotrichaceae fam. nov. within the class Ktedonobacteria. *Int. J. Syst. Evol. Microbiol.* **2010**, *60*, 1794-1801.
6. Yan, B.; Guo, X.; Liu, M.; Huang, Y. *Ktedonosporobacter rubrisoli* gen. nov., sp. nov., a novel representative of the class Ktedonobacteria, isolated from red soil, and proposal of Ktedonosporobacteraceae fam. nov. *Int. J. Syst. Evol. Microbiol.* **2020**, *70*, 1015-1025.
7. Wang, C.M.; Zheng, Y.; Sakai, Y.; Toyoda, A. Minakuchi, Y.; Abe, K.; et al. *Tengunoibacter tsumagoiensis* gen. nov., sp. nov., *Dictyobacter kobayashii* sp. nov., *Dictyobacter alpinus* sp. nov., and description of Dictyobacteraceae fam. nov. within the order Ktedonobacterales isolated from Tengu-no-mugimeshi, a soil-like granular mass of microorganisms, and emended descriptions of the genera *Ktedonobacter* and *Dictyobacter*. *Int. J. Syst. Evol. Microbiol.* **2019**, *69*, 1910-1918.
8. Zheng, Y.; Wang, C.M.; Sakai, Y.; Abe, K.; Yokota, A.; et al. *Thermogemmatispora aurantia* sp. nov. and *Thermogemmatispora argillosa* sp. nov., within the class Ktedonobacteria, and emended description of the genus *Thermogemmatispora*. *Int. J. Syst. Evol. Microbiol.* **2019**, *69*, 1744-1750.
